# Supplementary material for: Europium chelate-labeled lateral flow assay for rapid and multiple detection of β-lactam antibiotics by the penicillin-binding protein
Source: Royal Society of Chemistry journal article supplement (doi:10.1039/d0ay01140a), 2020-01-01
Supplement: d0ay01140a1.pdf [file d0ay01140a1.pdf]

## Supporting Information

Europium chelate-labeled lateral flow assay for rapid and multiple detection of  $\beta$ -lactam antibiotics by the penicillin-binding protein

Xiaogang Li<sup>a, #</sup>, Zhifeng Pan<sup>b, #</sup>, Manyu Li<sup>c</sup>, Xinmiao Jia<sup>a</sup>, Suhan Zhang<sup>c</sup>, Hang Lin<sup>c</sup>, Juntao Liu<sup>c</sup>, Liangkun Ma<sup>c\*</sup>

<sup>a</sup> Medical Science Research Center, Peking Union Medical College Hospital, Peking Union Medical College and Chinese Academy of Medical Sciences, Beijing, 100730

<sup>b</sup> School of Life Science, Fudan University, Shanghai 200433

<sup>c</sup> Department of Obstetrics and Gynecology, Peking Union Medical College Hospital, Peking Union Medical College and Chinese Academy of Medical Sciences, Beijing, 100730

\*Address correspondence to [maliangkun@pumch.cn](mailto:maliangkun@pumch.cn)

# The two authors contributed equally to this work.

Table of contents

S1 Expression and purification of recombinant PBP

Figure S1 Size distribution of pure microspheres (A) and lanthanide chelate-loaded microspheres (B)

Figure S2 Fluorescence lifetime of europium chelate-loaded polystyrene microspheres

Figure S3 Analytical performance of the assay for the detection of  $\beta$ -lactams

Figure S4 Workflow for LFRA

Table S1 The comparison of the proposed method with reported studies

**S1 Expression and purification of recombinant proteins**

The pET-28a (+)-PBP plasmid was synthesized by Wuxi Qinglan Biotech. Inc(wuxi, Jiangsu, China). *Escherichia coli* BL21(DE3) was transformed with the pET-28a (+)-PBP plasmid. For the lab-scale production of recombinant proteins, a modified protocol for expression was used. Briefly, precultures were grown at 37 °C for 6 h in 40 ml Luria-Bertani (10 g of tryptone, 5 g of yeast extract, 10 g of NaCl per liter) with 200 rpm shaking to an OD600 of 0.8. The expression of PBP was induced by the addition of IPTG to a final concentration of 1 mM, and the induced cultures were shaken for 16 h at 25 °C. Cells were harvested and resuspended in 50 mM sodium phosphate pH 8, 500 mM NaCl, and 10 mM imidazole. Cell lysis was performed by a 45-min incubation with 0.25 mg/ml lysozyme at room temperature (RT) followed by 3 freeze-thaw cycles at -196 °C and 37 °C, respectively. DNA was digested with 5 µg/ml DNase I for 15 min at RT. Cellular debris was pelleted at 20,000 × g and 4 °C. The supernatant containing 6x-histidine-tagged recombinant fusion proteins was applied to a His-tag Protein Purification Kit following the manufacturer's instructions (Beyotime Biotechnology).

The purified PBP (as assessed by 10% SDS-PAGE with Coomassie Brilliant Blue staining) was stored at -20 °C in the presence of 10% glycerol. The protein concentration was determined by the Bradford method.

**Amino Acid Sequence of PBP:**

MGSSHHHHHSSGLVPRGSHMRLTELREDIDAILEDPALEGAVSGVVVVDTA  
TGEELYSRDGGEQLLPASNMKLF TAAALEVLGADHSFGTEVAAESAPGRRG  
EVQDLYLVGRGDPTLSAEDLDAMAAEVAASGVRTVVRGDLYADDTWFDSEK

LVDDWWPEDEPYAYSQAQISALTVAHGERFDTGVTEVSVTPAAEGEPADVDL  
GAAEGYAELDNRAVTGAAGSANTLVIDRPVGTNTIAVTGSLPADAAPVTALR  
TVDEPAALAGHLFEEALESNGVTVKGDVGLGGVPADWQDAEVLADHTSAEL  
SEILVPMKFSNNGHAEMLVKSIGQETAGAGTWDAGLVGVVEALSGLGVDT  
AGLVLNDGSGLSRGNLVTADTVVDLLGQAGSAPWAQTWSASLPVAGESDPF  
VGGTLANRMRGTAAEGVVEAKTGTMSGVSALSQYVPGPEGELAFSIVNNGH  
SGPAPLAVQDAIAVRLAEYAGHQAPE

**Figure S1 Size distribution of pure microspheres (A) and lanthanide chelate-loaded microspheres (B)**

(A)

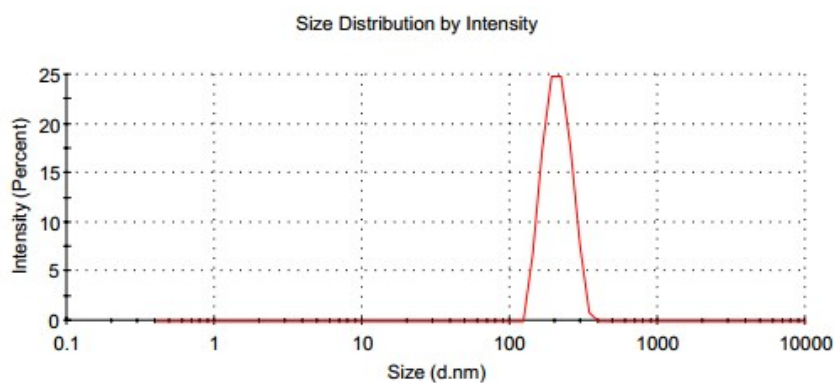

(B)

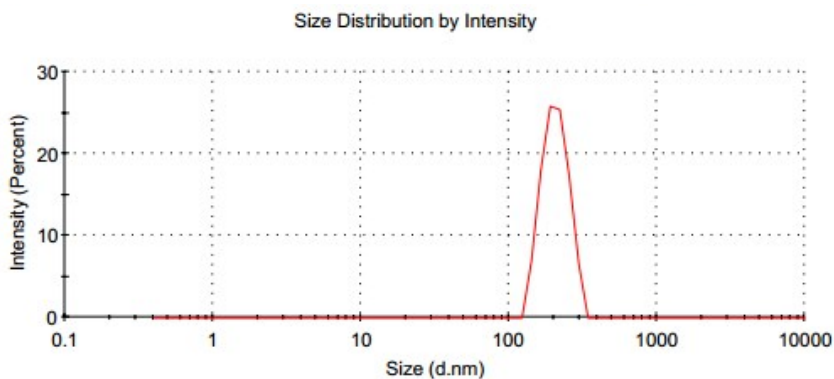

**Figure S2 The fluorescence lifetime of europium chelate-loaded polystyrene microspheres**

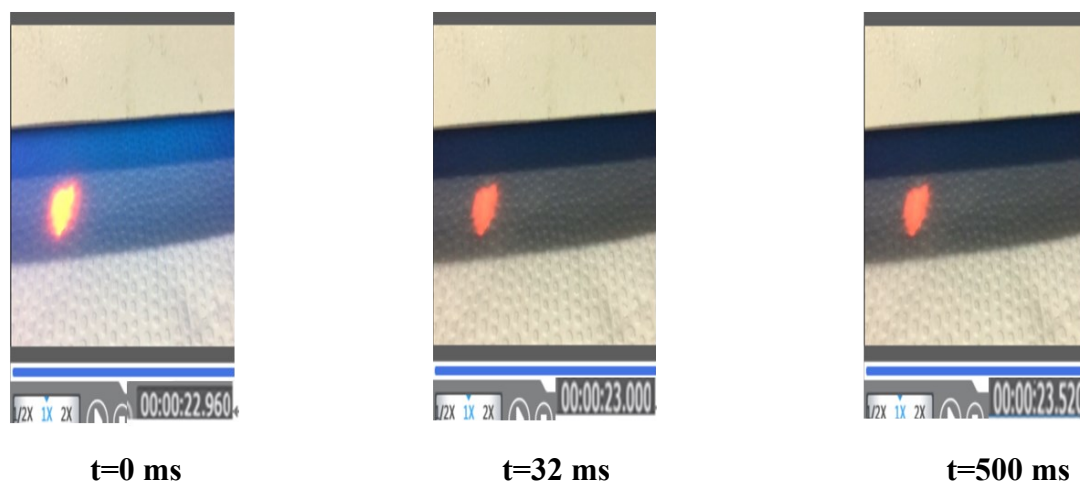

**Figure S3 Analytical performance of the assay for detecting  $\beta$ -lactams**

The assay can quantitatively detect  $\beta$ -lactams by measuring the fluorescence signal. To investigate the quantitative determination potential of the detection strategy for  $\beta$ -lactams, penicillin G, amoxicillin, and cefmetazole were employed as positive controls. The standard curve of the assays is shown in Figure S3, indicating the quantitative determination potential of a specific  $\beta$ -lactam antibiotic.

(A) penicillin G

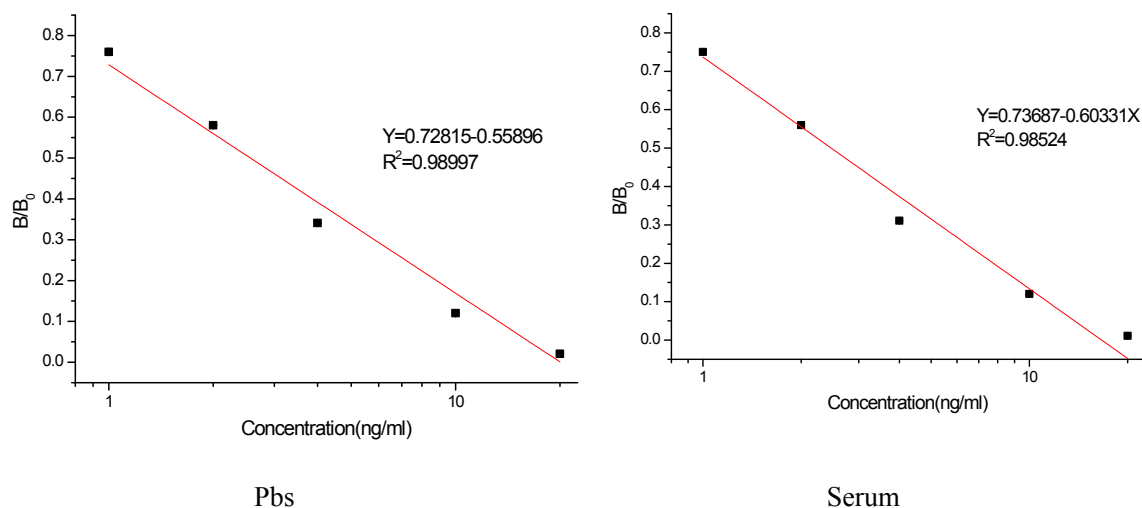

(B) amoxicillin

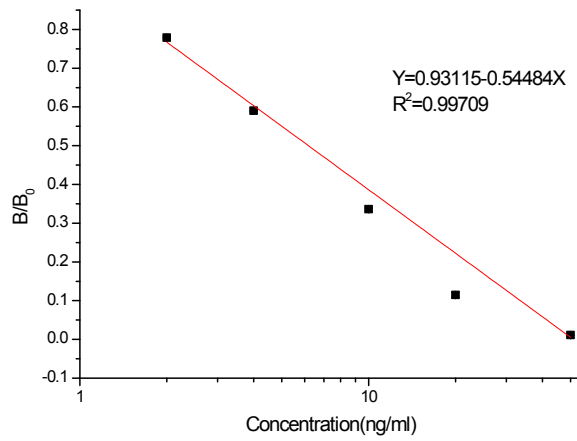

Pbs

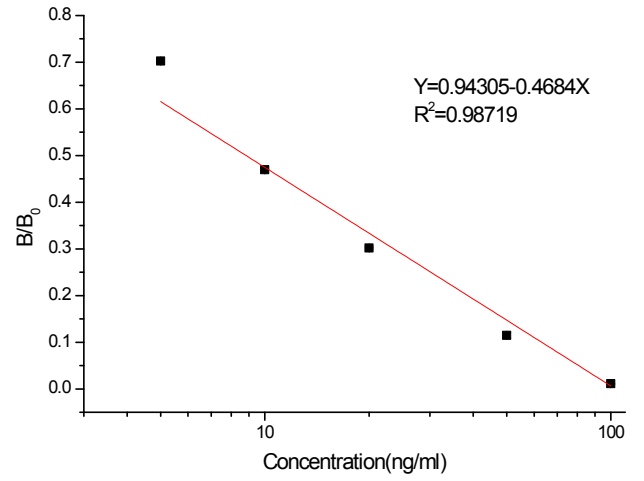

Serum

(C) cefmetazole

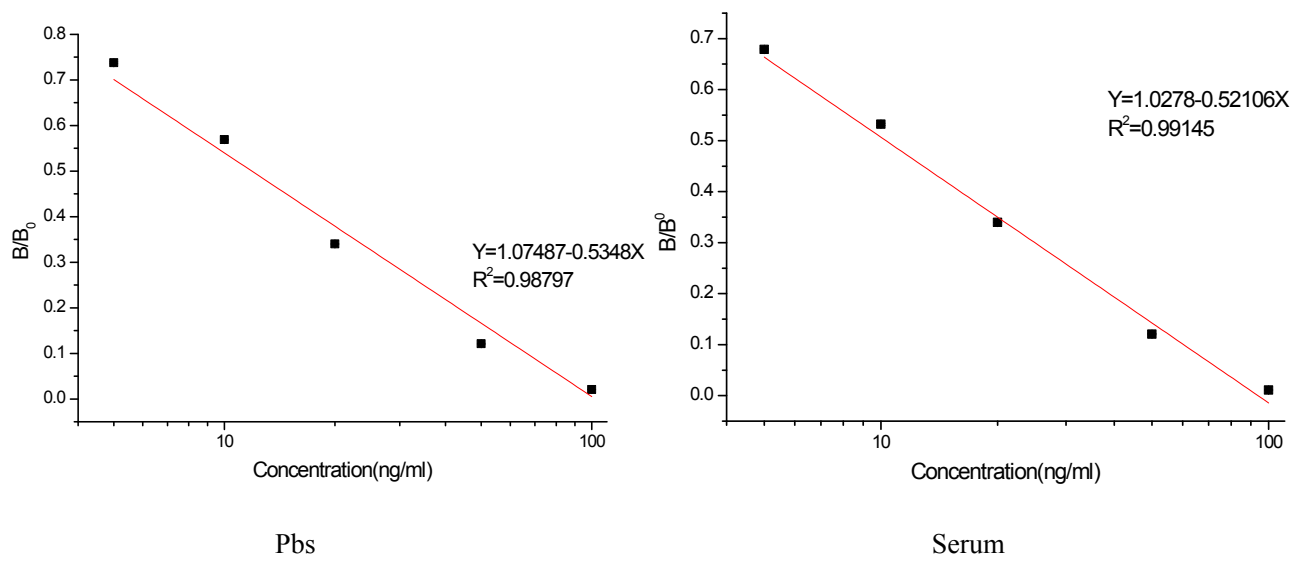

**Figure S4 Workflow of LFRA**

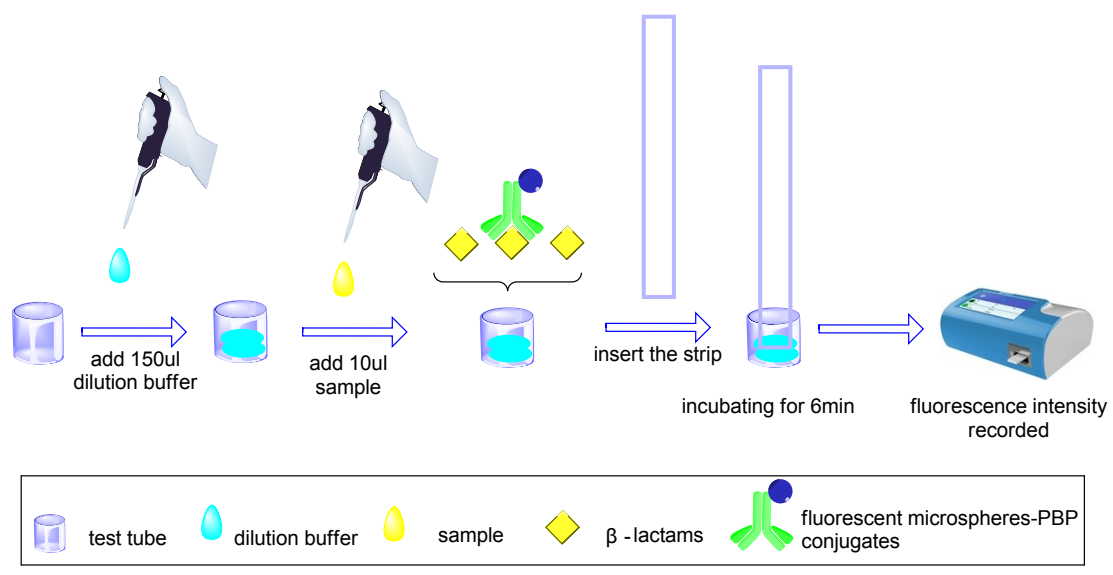

**Table S1 The comparison of the proposed method with reported studies**

| Method                         | System                                                                                                                                                                                                       | Detection limit (ng/mL) | Compound quantity | Time   | Reference |
|--------------------------------|--------------------------------------------------------------------------------------------------------------------------------------------------------------------------------------------------------------|-------------------------|-------------------|--------|-----------|
| Lateral flow fluorescent assay | Europium chelate-labeled lateral flow assay for rapid and multiple detection of $\beta$ -lactam antibiotics by the penicillin-binding protein                                                                | 4-500                   | 25                | 10 min | This work |
| Electrochemical assay          | Anti-penicillin G conjugation was used to develop a competitive immunosensor assay for the detection of penicillin G and other $\beta$ -lactam antibiotics                                                   | 5                       | 1                 | 60 min | 1         |
|                                | Electrochemical technique was used for the elaboration and characterization platform of ampicillin based on surface plasmon resonance                                                                        | 430                     | 1                 | 50 min | 2         |
|                                | Electrochemical aptasensor for ampicillin detection based on the protective effect of aptamer-antibiotic conjugate towards DpnII and Exo III digestion                                                       | 0.013                   | 1                 | 80 min | 3         |
|                                | Immobilized enzyme penicillinase (Pen X) was modified onto the modified electrode to prepare a biosensor                                                                                                     | 0.64                    | 1                 | 40min  | 4         |
| Colorimetric assay             | Ninhydrin, p-dimethylaminobenzaldehyde, and Fehling's reagent are used as reagents to develop paper-based test for amoxicillin                                                                               | $1.5 \times 10^6$       | 1                 | 10 min | 5         |
|                                | Colorimetric assay for ampicillin was developed based on Cu-BCA complexation                                                                                                                                 | $26 \times 10^3$        | 1                 | 30 min | 6         |
| chemiluminescence assay        | Chemiluminescence (CL) micro-flow system combined with on-line solid phase extraction (SPE) was used for determination of $\beta$ -lactam antibiotics (penicillin, cefradine, cefadroxil, cefalexin) in milk | 40-500                  | 4                 | 20 min | 7         |
|                                | Enhanced chemiluminescence of carminic acid permanganate by CdS quantum dot                                                                                                                                  | 5.8                     | 1                 | 30 min | 8         |
| Mass spectrometry              | Ultra-high-performance liquid chromatography-tandem mass spectrometry                                                                                                                                        | 500-1000                | 7                 | 20 min | 9         |
|                                | Liquid chromatography coupled with tandem mass spectrometric                                                                                                                                                 | 1000-2000               | 8                 | 15 min | 10        |

## References

- [1] G. Merola, E. Martini, M. Tomassetti, *J. Pharmaceut. Biomed.*, 2015, **106**, 186.
- [2] A. Blidar, B. Feier, M. Tertis, *Anal. Bioanal. Chem.*, 2019, **411**, 1053.
- [3] T. Wang, H. Yin, Y. Zhang, *Talanta*, 2019, **197**, 42.
- [4] Y. Xiu, R. Luo, B. Han, *Food Anal. Method.*, 2020, **13**, 617.
- [5] A.V. Marakaeva, I.V. Kosyreva, *Chem. Pap.*, 2020, **74**, 2381.
- [6] S. Kaur, M. Garg, S. Mittal, *Sensor. Actuat. B-chem.*, 2017, **248**, 234.
- [7] W. Liu, Z.J. Zhang, Z.Q. Liu, *Anal. Chim. Acta*, 2007, **592**, 187.
- [8] A. Khataee, A. Hasanzadeh, R. Lotfi, *Talanta*, 2016, **152**, 171.
- [9] R.R. Bonnin, A. Ribera, A.A. Roca, *Anal. Chim. Acta*, 2017, **468**, 215.
- [10] R. Bellouard, G. Deslandes, C. Morival, *J. Pharmaceut. Biomed.*, 2020, **178**, 112904.
